# Supplementary material
Source: PubMed Central journal article supplement (PMC3259777)
Supplement: supp_M803146200_Supptable.pdf [file supp_M803146200_Supptable.pdf]

**Table S1.** Bacterial strains and plasmids used in this study.

| Strain or plasmid               | Relevant genotype or phenotype                                                                                    | Source or reference |
|---------------------------------|-------------------------------------------------------------------------------------------------------------------|---------------------|
| Strains                         |                                                                                                                   |                     |
| <i>E. coli</i>                  |                                                                                                                   |                     |
| TOP10                           | Chemically competent cells                                                                                        | Invitrogen          |
| BL21 Star (DE3)                 | <i>F<sup>ompT hsdS<sub>B</sub> (r<sub>B</sub><sup>-</sup>m<sub>B</sub><sup>-</sup>)gal dcm rne131</sup></i> (DE3) | Invitrogen          |
| <i>P. aeruginosa</i>            |                                                                                                                   |                     |
| CHA                             | Mucoid CF isolate                                                                                                 | (1)                 |
| CHAΔ <i>pcrV</i>                | CHA with an internal deletion of the <i>pcrV</i> gene                                                             | (2)                 |
| Plasmids                        |                                                                                                                   |                     |
| pTOPO                           | Kn <sup>R</sup>                                                                                                   | Invitrogen          |
| pET-Duet1                       | Ap <sup>R</sup>                                                                                                   | Novagen             |
| pET-Duet1- <i>pcrV</i>          | Ap <sup>R</sup>                                                                                                   | <i>This study</i>   |
| pET-Duet1- <i>pcrVdeltaCter</i> | Ap <sup>R</sup>                                                                                                   | <i>This study</i>   |
| pIA60                           | 7-kb <i>EcoRI</i> fragment from CHA with <i>pcrGVH-popBD</i> and <i>exsCEBA</i> in pUC18                          | (2)                 |
| pIApG                           | Ap <sup>R</sup> , transcriptional fusion between promoter of <i>pcrGVHpopBD</i> (pG) and <i>gfpmut3</i> gene      | (2)                 |
| pIApG- <i>pcrV</i>              | Ap <sup>R</sup> , <i>XbaI/HindIII</i> fragment of <i>pcrV</i> into pIApG                                          | (2)                 |
| pIApG- <i>pcrVdeltaCter</i>     | Ap <sup>R</sup> , <i>XbaI/HindIII</i> fragment of <i>pcrVΔCter</i> into pIApG                                     | <i>This study</i>   |

**Table S2.** Oligonucleotides used in this study.

| Primer                    | DNA sequence <sup>a</sup>                    |
|---------------------------|----------------------------------------------|
| Cloning                   |                                              |
| CG_VNdeI                  | 5' <u>ACATATGGAAGTCAGAAACCTTAA</u> 3'        |
| CG_VAatII                 | 5' <u>AGACGTCTAGATCGCGCTGAGAATG</u> 3'       |
| CG_VXbaI                  | 5' <u>ATCTAGAATCTGAGGAATCACGATG</u> 3'       |
| CG_VHindIII               | 5' <u>AAAGCTTGATCGCGCTGAGAATGTC</u> 3'       |
| CG_deltaVAatII            | 5' <u>AGACGTCTCAGTCGTCAGCGGACGC</u> 3'       |
| CG_deltaVHindIII          | 5' <u>AAAGCTTTCAGTCGTTTCAGCGGACGC</u> 3'     |
| Site directed mutagenesis |                                              |
| L262A_sens                | 5' GAGAAGACCACCCTGGCGAACGACACCAGCTCC 3'      |
| L262A_as                  | 5' GGAGTCGGTGTCTCGTTCGCCAGGGTGGTCTTCTC 3'    |
| L262D_sens                | 5' GAGAAGACCACCCTGGACAACGACACCAGCTCC 3'      |
| L262D_as                  | 5' GGAGTCGGTGTCTCGTTGTCCAGGGTGGTCTTCTC 3'    |
| CG_msPcrV_L276A           | 5' TCGGCGGTTCGAGGCGGCCAACCGCTTCATCCAG 3'     |
| CG_masPcrV_L276A          | 5' CTGGATGAAGCGGTTGGCCGCCTCGACCGCCGA 3'      |
| L276D_sens                | 5' CTGGATGAAGCGGTTGGCCGCCTCGACCGCCGA 3'      |
| L276D_as                  | 5' CTGGATGAAGCGGTTGTCCGCCTCGACCGCCGA 3'      |
| CG_msPcrV_R278A           | 5' CGAGGCGCTCAACGCCTTCATCCAGAAATACG 3'       |
| CG_masPcrV_R278A          | 5' CGTATTTCTGGATGAAGGCGTTGAGCGCCTCG 3'       |
| CG_msPcrV_F279A           | 5' TCGAGGCGCTCAACCGCGCCATCCAGAAATACGACAG 3'  |
| CG_masPcrV_F279A          | 5' TCGAGGCGCTCAACCGCGCCATCCAGAAATACGACAG 3'  |
| CG_msPcrV_Y283A           | 5' CTGTCGTATTTCTGGATGGCGCGGTTGAGCGCCTCGA 3'  |
| CG_masPcrV_Y283A          | 5' ACCGCTTCATCCAGAAAGCCGACAGCGTCCTGCGCGAC 3' |
| CG_msPcrV_D284A           | 5' GTCGCGCAGGACGCTGTCCGCTTTCTGGATGAAGCGGT 3' |
| CG_masPcrV_D284A          | 5' CATCCAGAAATACGCCAGCGTCCTGCGCG 3'          |
| CG_msPcrV_V286A           | 5' CGCGCAGGACGCTGGCGTATTTCTGGATG 3'          |
| CG_masPcrV_V286A          | 5' TCCAGAAATACGACAGCGCCCTGCGCGACATTCTCAG 3'  |
| CG_msPcrV_R288A           | 5' CTGAGAATGTCGCGCAGGGCGCTGTCGTATTTCTGGA 3'  |
| CG_masPcrV_R288A          | 5' CGACAGCGTCCTGGCCGACATTCTCAGCGCG 3'        |
| CG_msPcrV_I290A           | 5' CGCGCTGAGAATGTCCGCCAGGACGCTGTCG 3'        |
| CG_masPcrV_I290A          | 5' ACAGCGTCCTGCGCGACGCCCTCAGCGCGATCTAGAC 3'  |
|                           | 5' GTCTAGATCGCGCTGAGGGCGTCGCGCAGGACGCTGT 3'  |

<sup>a</sup> Restriction sites or mismatching bases incorporated into primers are underlined.

## References

1. Toussaint, B., Delic-Attree, I., and Vignais, P. M. (1993) *Biochem. Biophys. Res. Commun.* **196**, 416-421
2. Goure, J., Pastor, A., Faudry, E., Chabert, J., Dessen, A., and Attree, I. (2004) *Infect. Immun.* **72**, 4741-4750
